# Supplementary material
Source: PubMed Central journal article supplement (PMC8691856)
Supplement: mmc1.pdf [file mmc1.pdf]

# THE LANCET

## Rheumatology

### Supplementary appendix

This appendix formed part of the original submission and has been peer reviewed. We post it as supplied by the authors.

Supplement to: Smetanova J, Strizova Z, Sediva A, Milota T, Horvath R. Humoral and cellular immune responses to mRNA COVID-19 vaccines in patients with axial spondyloarthritis treated with adalimumab or secukinumab. *Lancet Rheumatol* 2021; published online Dec 21. [https://doi.org/10.1016/S2665-9913\(21\)00393-3](https://doi.org/10.1016/S2665-9913(21)00393-3).

**Table 1.**

| COHORT                              | ALL (n=17)     | ADA (n=10)      | SEC (n=7)      | p value                  |
|-------------------------------------|----------------|-----------------|----------------|--------------------------|
| <b>Demography</b>                   |                |                 |                |                          |
| Gender (males)                      | 15 (88.2%)     | 9 (90%)         | 6 (85.7%)      | 0.99 <sup>1)</sup>       |
| Age (mean, +/-SD, yr.)              | 39.76 (+/-9.4) | 40.1 (+/-9.2)   | 39.3 (+/-10.4) | 0.76 <sup>2)</sup>       |
| <b>Disease characteristics</b>      |                |                 |                |                          |
| AS (n, %)                           | 11 (64.7%)     | 8 (80%)         | 3 (42.9%)      | 0.16 <sup>1)</sup>       |
| Nr-AxSpA (n, %)                     | 6 (35.3%)      | 2 (20%)         | 4 (57.1%)      | 0.16 <sup>1)</sup>       |
| HLA B27 (n, %)                      | 14 (82.4%)     | 8 (80%)         | 6 (85.7%)      | 0.99 <sup>1)</sup>       |
| Disease duration (mean, +/-SD, mo.) | 97.3 (+/-80.8) | 124.4 (+/-93.5) | 54.9 (+/-21.8) | 0.13 <sup>2)</sup>       |
| Extraskeletal manif. (n, %)         | 6 (35.3%)      | 4 (40%)         | 2 (28.6%)      | 0.64 <sup>1)</sup>       |
| <i>Uveitis</i> (n, %)               | 2 (11.8%)      | 1 (10%)         | 1 (14.3%)      | 0.99 <sup>1)</sup>       |
| <i>Psoriasis</i> (n, %)             | 4 (23.5%)      | 3 (30%)         | 1 (14.3%)      | 0.60 <sup>1)</sup>       |
| <b>Disease activity</b>             |                |                 |                |                          |
| SJC-66 (mean +/- SD)                | 0.35 (+/-1.44) | 0               | 0.86 (+/-2.27) | 0.41 <sup>2)</sup>       |
| TJC-68 (mean +/- SD)                | 0.41 (+/-1.7)  | 0               | 1.0 (+/-2.65)  | 0.41 <sup>2)</sup>       |
| CRP (mean +/- SD, mg/L)             | 3.68 (+/-3.39) | 2.12 (+/-0.67)  | 6.13 (+/-4.51) | <b>0.01<sup>2)</sup></b> |
| ASDAS-CRP (mean +/- SD)             | 1.27 (+/-0.74) | 0.91 (+/-0.36)  | 1.77 (+/-0.86) | <b>0.02<sup>2)</sup></b> |
| BASDAI (mean +/- SD)                | 0.9 (+/-1.03)  | 0.54 (+/-0.6)   | 1.46 (+/-1.34) | 0.21 <sup>2)</sup>       |
| BASFI (mean +/- SD)                 | 0.69 (+/-0.71) | 0.6 (+/-0.67)   | 0.81 (+/-0.8)  | 0.68 <sup>2)</sup>       |
| HAQ (mean +/- SD)                   | 0.2 (+/-0.29)  | 0.25 (+/-0.34)  | 0.13 (+/-0.23) | 0.42 <sup>2)</sup>       |
| <b>Treatment</b>                    |                |                 |                |                          |
| duNSAID (n, %)                      | 0              | 0               | 0              | 0.99 <sup>1)</sup>       |
| bDMARD dosage (mg)                  | ----           | 40 (+/-0.0)     | 150 (+/-0.0)   | ----                     |
| GCs (n, %)                          | ----           | 16.8 (+/- 3.6)  | 28 (+/-0.0)    | ----                     |

**Table 1.**

**Baseline characteristics (Day 0) of the study cohort:** 17 enrolled patients with ankylosing spondylitis (AS) and non-radiographic axial spondyloarthritis (Nr-AxSpA) treated with adalimumab (ADA) or secukinumab (SEC). Statistically significant differences (<sup>1)</sup>Fisher's exact test, or <sup>2)</sup>Unpaired t test with Welch's correlation  $p \leq 0.05$ ) are bold highlighted (SD= standard deviation, mo.= months, yr.= years, SJC= swollen joint count, TJC= tender joint count, CRP= C-reactive protein, ASDAS= Ankylosing Spondylitis Disease Activity Score, BASDAI= Bath Ankylosing Spondylitis. Disease Activity Index, BASFI= Bath Ankylosing Spondylitis Functional Index, HAQ= Health assessment questionnaire, duNSAIDs= daily use of Non-steroidal anti-inflammatory drugs, bDMARDS= Biologic Disease-Modifying Antirheumatic Drugs, GCs= Glucocorticoids).

**Table 2.**

|                               | <b>IgA (U/ml)</b><br><b>POSITIVE ABOVE 18 U/ml</b> | <b>IgG (U/ml)</b><br><b>POSITIVE ABOVE 18 U/ml</b> |
|-------------------------------|----------------------------------------------------|----------------------------------------------------|
| <b>HEALTHY<br/>CONTROLS</b>   | 114.98                                             | >1000.00                                           |
|                               | 462.722                                            | >1000.00                                           |
|                               | 329.231                                            | >1000.00                                           |
|                               | 450.804                                            | >1000.00                                           |
|                               | 115.708                                            | >1000.00                                           |
|                               | 430.5                                              | >1000.00                                           |
| <b>ADALIMUMAB<br/>COHORT</b>  | 30.81                                              | >1000.00                                           |
|                               | 284.88                                             | >1000.00                                           |
|                               | 29.74                                              | >1000.00                                           |
|                               | 30.18                                              | >1000.00                                           |
|                               | 164.36                                             | >1000.00                                           |
|                               | 98.33                                              | >1000.00                                           |
|                               | 45.37                                              | >1000.00                                           |
|                               | 91.76                                              | >1000.00                                           |
|                               | 165.05                                             | >1000.00                                           |
|                               | 80.56                                              | >1000.00                                           |
| <b>SECUKINUMAB<br/>COHORT</b> | 26,05                                              | >1000.00                                           |
|                               | 200,12                                             | >1000.00                                           |
|                               | 21,72                                              | 64,62                                              |
|                               | 111,87                                             | >1000.00                                           |
|                               | 59,89                                              | >1000.00                                           |
|                               | 51,39                                              | >1000.00                                           |
|                               | 151,56                                             | >1000.00                                           |

**Table 2.**

**Humoral immune responses.** IgA and IgG antibody titres in study participants vaccinated with two standard doses of anti-SARS-CoV-2 mRNA vaccina BNT162b2.

**Table 3.**

| Healthy controls                               | Adalimumab cohort                              | Secukinumab cohort                             |
|------------------------------------------------|------------------------------------------------|------------------------------------------------|
| CD4 <sup>+</sup> IFN $\gamma$ <sup>+</sup> 0%  | CD4 <sup>+</sup> IFN $\gamma$ <sup>+</sup> 30% | CD4 <sup>+</sup> IFN $\gamma$ <sup>+</sup> 0%  |
| CD4 <sup>+</sup> TNF $\alpha$ <sup>+</sup> 0%  | CD4 <sup>+</sup> TNF $\alpha$ <sup>+</sup> 40% | CD4 <sup>+</sup> TNF $\alpha$ <sup>+</sup> 0%  |
| CD4 <sup>+</sup> IL17A <sup>+</sup> 17%        | CD4 <sup>+</sup> IL17A <sup>+</sup> 30%        | CD4 <sup>+</sup> IL17A <sup>+</sup> 0%         |
| CD8 <sup>+</sup> IFN $\gamma$ <sup>+</sup> 17% | CD8 <sup>+</sup> IFN $\gamma$ <sup>+</sup> 20% | CD8 <sup>+</sup> IFN $\gamma$ <sup>+</sup> 14% |
| CD8 <sup>+</sup> TNF $\alpha$ <sup>+</sup> 0%  | CD8 <sup>+</sup> TNF $\alpha$ <sup>+</sup> 20% | CD8 <sup>+</sup> TNF $\alpha$ <sup>+</sup> 0%  |
| CD8 <sup>+</sup> CD107a <sup>+</sup> 0%        | CD8 <sup>+</sup> CD107a <sup>+</sup> 50%       | CD8 <sup>+</sup> CD107a <sup>+</sup> 57%       |

**Table 3.**

**Cellular non-responders.** Full vaccination with the BNT162b2 vaccine revealed individual differences in the cellular immune responses with a percentage of non-responders observed in each study cohort.
